# Supplementary material
Source: ML conference proceedings conference paper supplement (https://proceedings.mlr.press/v119/quinn20a.html)
Supplement: Supplementary file [file quinn20a-supp.pdf]

000  
001  
002  
003  
004  
005  
006  
007  
008  
009  
010  
011  
012

## *Supplement for:* **DeepCoDA: personalized interpretability for compositional health data**

013  
014  
015  
016  
017  
018  
019

### **0.1. Study 4: 2-levels of interpretability (expanded)**

020  
021  
022  
023  
024  
025  
026  
027  
028

The **DeepCoDA** framework offers 2-levels of interpretability: (1) the "weights" of the self-explanation module (layer  $w$  in Figure 1 of the main paper) tell us how the classifier predicts a class label; (2) the weights of the log-bottleneck module ( $\theta_z$  in Figure 1 of the main paper) tell us which features contribute to each log-contrast.

029  
030  
031  
032  
033  
034  
035  
036

At the **first level**, the product scores ( $w_i * z_i$ ) can be interpreted directly by a clinical laboratory or researcher to identify which features drive the final prediction. When a classifier makes a decision, the patient-specific weights ( $w_i$ ) are multiplied with the log-contrast values ( $z_i$ ), then added together. In data set "3", a patient is predicted to have inflammatory bowel disease if this sum exceeds zero; otherwise, the patient is healthy. The largest product scores contribute most to the decision.

037  
038  
039  
040  
041

Consider two patients, chosen randomly:

- Patient 26 is healthy: their product scores are [2.0, -15.6, -3.6, -1.1, 1.8].
- Patient 13 is unhealthy: their product scores are [0.5, -7.3, 8.8, 7.4, 0.1].

042  
043  
044  
045  
046  
047

For patient 26, the second term is highly negative, suggesting that the patient is healthy. Since the second term is derived from the second log-contrast, we can infer that log-contrast 2 is most important for this prediction.

048  
049  
050  
051  
052  
053  
054

For patient 13, the third and fourth terms are highly positive, suggesting that the patient is unhealthy. Interestingly, the second is highly negative (like patient 26), suggesting that the second log-contrast "looks" healthy. However, this negative score is not enough to sway the final decision.

At the **second level**, the log-bottleneck weights define how each bacteria contribute to the ratios. For log-contrast 3, the bacteria *Gordonibacter pamelaee* makes the largest contribution to the numerator, while *Bacteroides cellulosilyticus* makes the largest contribution to the denominator. For patient 13, the log-contrast values are [0.61, -2.98, -4.64, 5.79, -1.76]. The signs of the log-contrasts reveal which

bacteria dominate. Negative values mean that the denominator bacteria outweigh those in the numerator; positives mean that the numerator outweighs the denominator.

Meanwhile, our canonical correlation analysis reminds us that the importance of log-contrast 3 ( $w_3$ ) depends on the value of log-contrast 2 ( $z_2$ ), via an interaction learned automatically from the data. The top panels in Figure 5 summarize the distribution of these patient-specific weights and log-contrast values across the entire patient cohort.

055  
056  
057  
058  
059  
060  
061  
062  
063  
064  
065  
066  
067  
068  
069  
070  
071  
072  
073  
074  
075  
076  
077  
078  
079  
080  
081  
082  
083  
084  
085  
086  
087  
088  
089  
090  
091  
092  
093  
094  
095  
096  
097  
098  
099  
100  
101  
102  
103  
104  
105  
106  
107  
108  
109

| Data set ID | # Samples | # Features | # Classes | Class 1                   | Class 2               |
|-------------|-----------|------------|-----------|---------------------------|-----------------------|
| 1           | 975       | 48         | 2         | Crohn's disease           | Without               |
| 2           | 128       | 60         | 2         | Men who have sex with men | Without               |
| 3           | 220       | 153        | 2         | Control                   | IBD                   |
| 4           | 164       | 158        | 2         | Crohn's disease           | Ulcerative colitis    |
| 5           | 220       | 885        | 2         | Control                   | IBD                   |
| 6           | 164       | 885        | 2         | Crohn's disease           | Ulcerative colitis    |
| 7           | 182       | 278        | 2         | Case                      | Diarrheal control     |
| 8           | 247       | 610        | 2         | Case                      | Non-Diarrheal control |
| 9           | 292       | 1133       | 2         | Colorectal cancer (CRC)   | Without               |
| 10          | 318       | 1302       | 2         | Colorectal cancer (CRC)   | Non-CRC control       |
| 11          | 1182      | 188        | 2         | Primary solid tumor       | Solid tissue normal   |
| 12          | 1004      | 188        | 2         | Her2 Cancer               | Not Her2 Cancer       |
| 13          | 718       | 188        | 2         | LumA Cancer               | LumB Cancer           |
| 14          | 140       | 992        | 2         | Crohn's disease (ileum)   | Without (ileum)       |
| 15          | 160       | 992        | 2         | Crohn's disease (rectum)  | Without (rectum)      |
| 16          | 2070      | 3090       | 2         | GI tract                  | Oral                  |
| 17          | 180       | 3090       | 2         | Female                    | Male                  |
| 18          | 404       | 3090       | 2         | Stool                     | Tongue (dorsum)       |
| 19          | 408       | 3090       | 2         | Subgingival plaque        | Supragingival plaque  |
| 20          | 172       | 980        | 2         | Healthy                   | Colorectal cancer     |
| 21          | 124       | 2526       | 2         | Without                   | Diabetes              |
| 22          | 130       | 2579       | 2         | Cirrhosis                 | Without               |
| 23          | 199       | 660        | 2         | Black                     | Hispanic              |
| 24          | 342       | 660        | 2         | Nugent score high         | Nugent score low      |
| 25          | 200       | 660        | 2         | Black                     | White                 |

Table 1. Characteristics of the 25 data sets used in Section 4.3.

110  
111  
112  
113  
114  
115  
116  
117  
118  
119  
120  
121  
122  
123  
124  
125  
126  
127  
128  
129  
130  
131  
132  
133  
134  
135  
136  
137  
138  
139  
140  
141  
142  
143  
144  
145  
146  
147  
148  
149  
150  
151  
152  
153  
154  
155  
156  
157  
158  
159  
160  
161  
162  
163  
164

---

| <b>Data set ID</b> | <b>Original source</b>           | <b>Retrieved via</b>                       |
|--------------------|----------------------------------|--------------------------------------------|
| 1                  | doi: 10.1016/j.chom.2014.02.005  | doi: 10.1128/mSystems.00053-18             |
| 2                  | doi: 10.1016/j.ebiom.2016.01.032 | doi: 10.1128/mSystems.00053-18             |
| 3                  | doi: 10.1038/s41564-018-0306-4   | supplemental materials                     |
| 4                  | doi: 10.1038/s41564-018-0306-4   | supplemental materials                     |
| 5                  | doi: 10.1038/s41564-018-0306-4   | supplemental materials                     |
| 6                  | doi: 10.1038/s41564-018-0306-4   | supplemental materials                     |
| 7                  | doi: 10.1128/mBio.01021-14       | doi: doi.org/10.1038/s41467-017-01973-8    |
| 8                  | doi: 10.1128/mBio.01021-15       | doi: doi.org/10.1038/s41467-017-01973-9    |
| 9                  | doi: 10.1186/s13073-016-0290-3   | doi: doi.org/10.1038/s41467-017-01973-10   |
| 10                 | doi: 10.1186/s13073-016-0290-3   | doi: doi.org/10.1038/s41467-017-01973-11   |
| 11                 | doi: 10.1038/ng.2764             | labels from doi: 10.1186/s13058-016-0724-2 |
| 12                 | doi: 10.1038/ng.2764             | labels from doi: 10.1186/s13058-016-0724-2 |
| 13                 | doi: 10.1038/ng.2764             | labels from doi: 10.1186/s13058-016-0724-2 |
| 14                 | doi: 10.1016/j.chom.2014.02.005  | doi: 10.1093/gigascience/giz042            |
| 15                 | doi: 10.1016/j.chom.2014.02.005  | doi: 10.1093/gigascience/giz043            |
| 16                 | doi: 10.1038/nature11209         | doi: 10.1093/gigascience/giz044            |
| 17                 | doi: 10.1038/nature11209         | doi: 10.1093/gigascience/giz045            |
| 18                 | doi: 10.1038/nature11209         | doi: 10.1093/gigascience/giz046            |
| 19                 | doi: 10.1038/nature11209         | doi: 10.1093/gigascience/giz047            |
| 20                 | doi: 10.1101/gr.126573.111       | doi: 10.1093/gigascience/giz048            |
| 21                 | doi: 10.1038/nature11450         | doi: 10.1093/gigascience/giz049            |
| 22                 | doi: 10.1038/nature13568         | doi: 10.1093/gigascience/giz050            |
| 23                 | doi: 10.1073/pnas.1002611107     | doi: 10.1093/gigascience/giz051            |
| 24                 | doi: 10.1073/pnas.1002611107     | doi: 10.1093/gigascience/giz052            |
| 25                 | doi: 10.1073/pnas.1002611107     | doi: 10.1093/gigascience/giz053            |

Table 2. Sources for the 25 data sets used in Section 4.3.

165  
166  
167  
168  
169  
170  
171  
172  
173  
174  
175  
176  
177  
178  
179  
180  
181  
182  
183  
184  
185  
186  
187  
188  
189  
190  
191  
192  
193  
194  
195  
196  
197  
198  
199  
200  
201  
202  
203  
204  
205  
206  
207  
208  
209  
210  
211  
212  
213  
214  
215  
216  
217  
218  
219

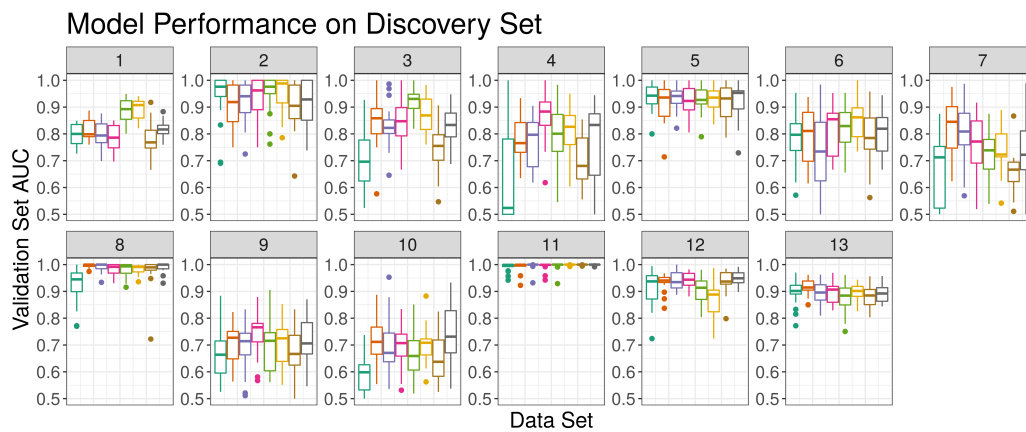

Figure 1. This figure shows the AUC for several models, organized by the method (x-axis) and data set source (facet). For all models, the boxplot shows the AUC distribution across 20 random 90%-10% training-test set splits. All **DeepCoDA** models use 5 log-bottlenecks and an L1 penalty of 0.01, chosen based on the “discovery set”. Our model achieves appreciable performance across the 25 data sets. However, our aim is not to improve performance, but to extend personalized interpretability to compositional data.

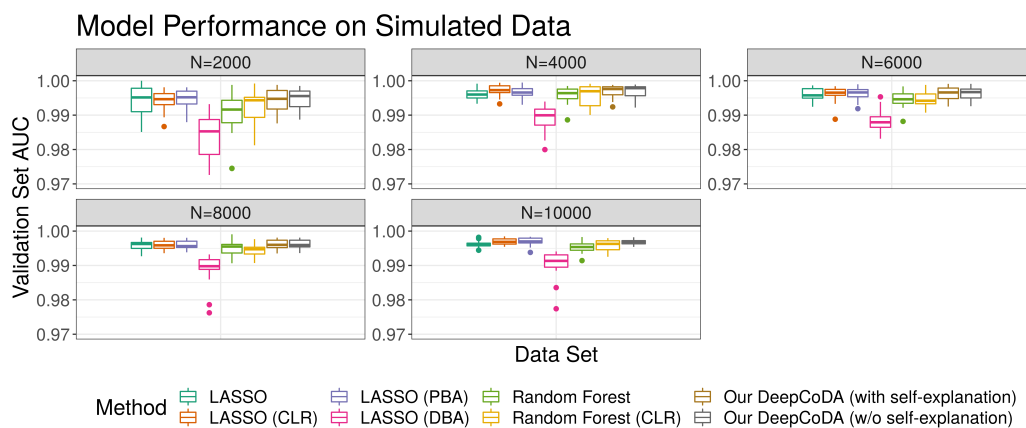

Figure 2. This figure shows the AUC for several models, organized by the method (x-axis) and number of samples in the second synthetic data set (facet). For all models, the boxplot shows the AUC distribution across 20 random 90%-10% training-test set splits. This figure confirms that the **DeepCoDA** model can scale to larger data sets with many samples.
